# Supplementary material for: One pot synthesis of coordination polymer 2,5-dimercapto-1,3,4-thiadiazole–gold and its application in voltammetric sensing of resorcinol
Source: Royal Society of Chemistry journal article supplement (doi:10.1039/c4ra02983f), 2014-01-01

## **Supporting Information (SI):**

### **One Pot Synthesis of Coordination Polymer 2,5-Dimercapto-1,3,4-thiadiazole-Gold and its Application in Voltammetric Sensing of Resorcinol**

MadhuTiwari, Sandeep Gupta, Rajiv Prakash\*

School of Materials Science and Technology, Indian Institute of Technology,  
(Banaras Hindu University) Varanasi-221005

\*Corresponding Author: Fax: +91-542-2368707

E-mail: rajivprakash12@yahooo.com

**SI-1:** HRTEM image (Inset: zoom view) and corresponding SAED pattern of DMTD-Au.

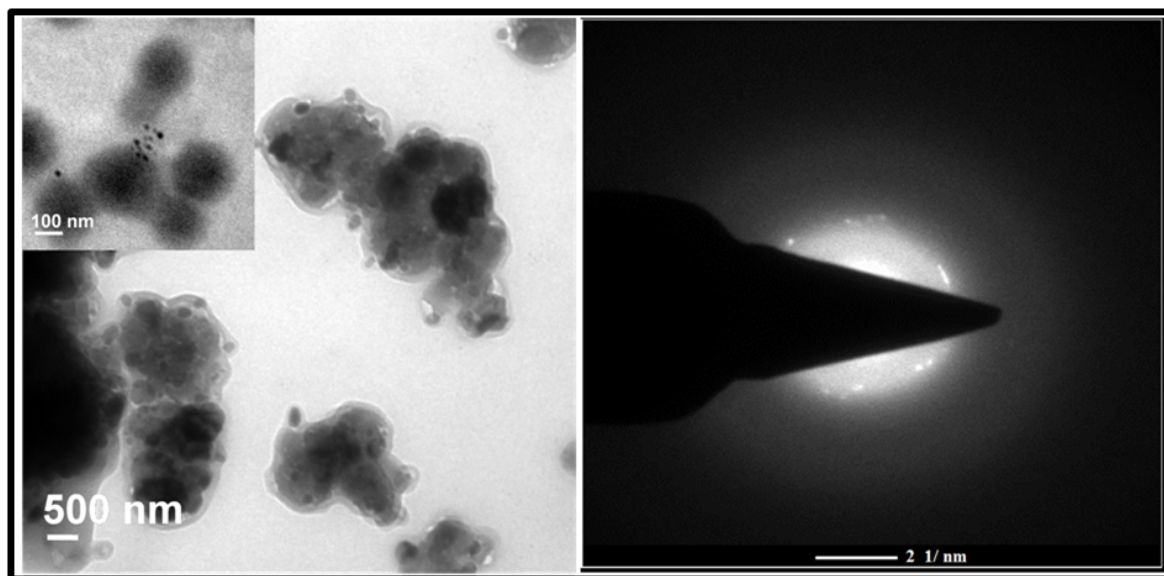

**SI-2:** Gel permeation chromatogram of DMTD-Au.

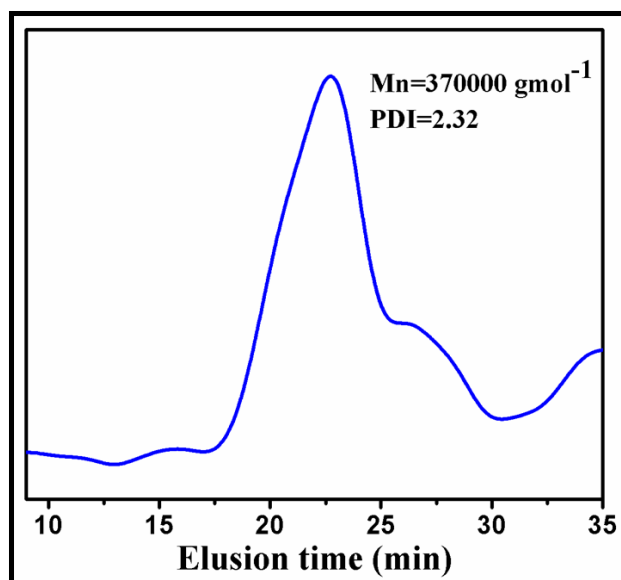

**SI-3:** Thermal Activation Energy plot of DMTD-Au.

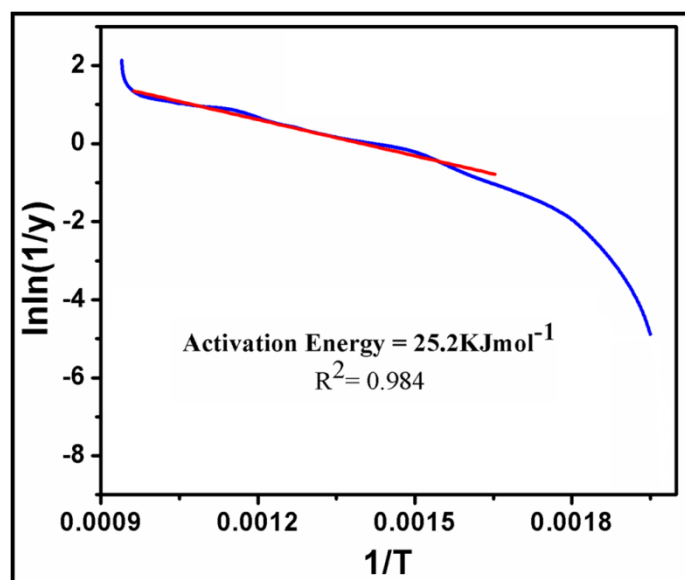

Supplement: c4ra02983f1.pdf [file c4ra02983f1.pdf]
